# Supplementary material
Source: Springer Nature journal article supplement (https://www.springermedizin.de/resource/supplementary/12985_2010_1197_MOESM2_ESM.pdf/9610408)

(A)

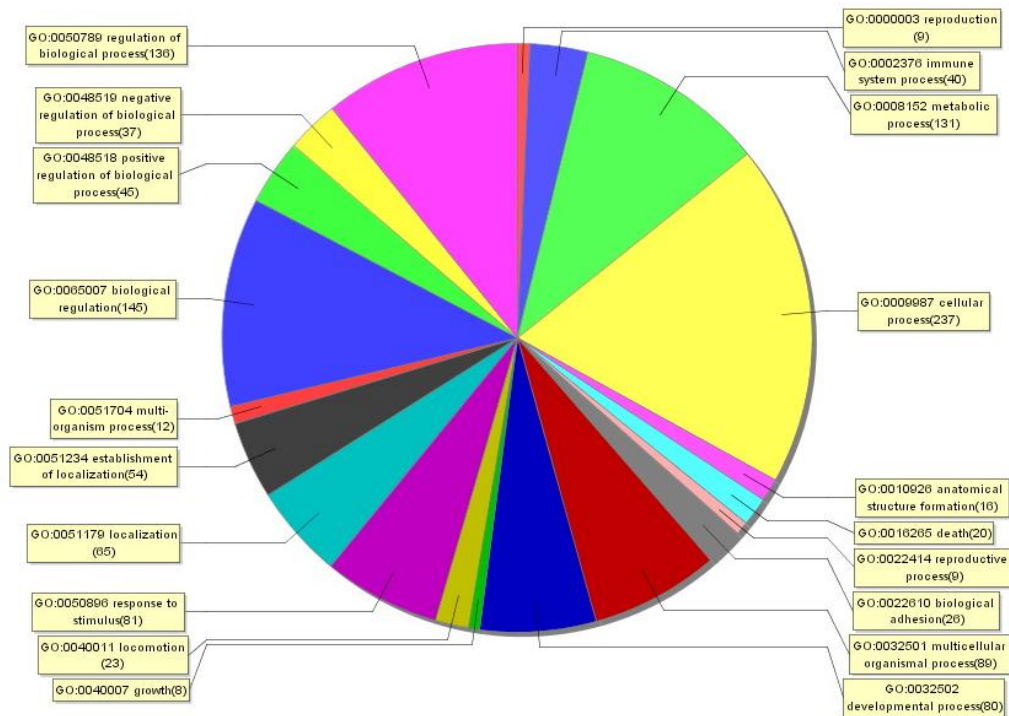

(B)

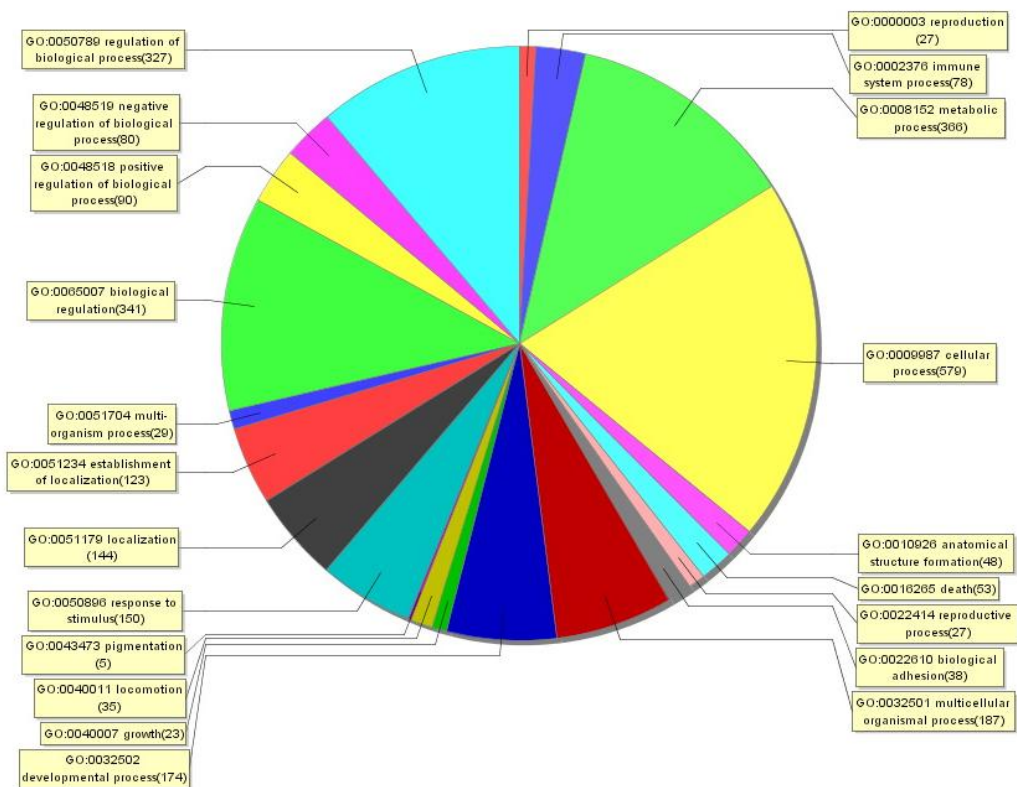

Supplement: MOESM2 [file 9610408]
